# Supplementary material for: Monitoring of gene knockouts: genome-wide profiling of conditionally essential genes
Source: PubMed Central journal article supplement (PMC1929150; doi:10.1186/gb-2007-8-5-r87), 2007-05-22

### Supplementary Figure 3

Optimization of microarray target preparation in MGK. **(a)** Determination of the optimum number of cycles for linear amplification of single-stranded DNA. A 50  $\mu\text{l}$  of reaction mixture contains 40  $\mu\text{g}$  of genomic DNA ( $\sim 12$  fmole) isolated from the random library; 2  $\mu\text{l}$ , 10 mM dNTP; 3 pmole,  $^{32}\text{P}$ -labeled Tn10OE primer; and 2  $\mu\text{l}$ , Taq DNA polymerase (HotMaster, Eppendorf) in 1x HotMaster PCR buffer. Reactions were carried out at 94°C for 30 sec and 60°C for 20 sec, and samples (6  $\mu\text{l}$ ) were taken each at 15, 30, 45, and 60th cycle to run on 6% SDS-polyacrylamide gel with 8 M urea. We chose the minimum number of cycles, 15 cycles, to prevent a possible appearance of any dominant species of single-stranded DNA. **(b)** Determination of the optimum molar ratio of primer to genome for production of single-stranded DNA.  $^{32}\text{P}$ -labeled Tn10OE primer was added at the ratio (primer to genome) of 100, 300, 500, 700 or 1000 (lanes 1-5), respectively. Reaction was carried out for 15 cycles of 94°C for 30 sec and 60°C for 20 sec. A 25  $\mu\text{l}$  of reaction mixture contains the same as in (a) except 10  $\mu\text{g}$  of genomic DNA ( $\sim 3$  fmole) used as template and varying primer concentration. Samples (4  $\mu\text{l}$ ) were run on 6% SDS-polyacrylamide gel with 8 M urea. We chose the ratio, 300, of primer to genome to prevent a possible appearance of any dominant species of single-stranded DNA. **(c)** A summary of different washing systems tested. The biotinylated flanks were produced in 100  $\mu\text{l}$  of primer extension reaction at the condition chosen in (a) and (b), and separated from the genomic DNA using streptavidin-coated magnetic beads. Beads containing biotinylated flanks were washed using each washing system and finally resuspended in 20  $\mu\text{l}$  H<sub>2</sub>O (equivalent to 100 ml of primer extension reaction). The beads (2  $\mu\text{l}$  each) were then used as template in 50  $\mu\text{l}$  of PCR for 30 cycles of 94°C for 30 sec,

55°C for 30 sec, and 68°C for 30 sec. As a control for PCR, wild-type genomic DNA was used as template to amplify an essential (*plsC*) and a nonessential gene (*yghG*), respectively. PCR amplification of the essential gene indicates the contamination of genomic DNA in the beads. (1) The beads were washed 5 times with 200 µl of 50% formamide followed by washing 5 times with water. (2) The beads were incubated at 55°C for 5 min in water before washing with water in (1). (3) The beads were incubated at 90°C for 10 min in 10 mM NaOH before washing with water in (1). (4) The beads were incubated at 90°C for 5 min in 1x HotMaster PCR buffer (Eppendorf) before washing with water in (1). M: DNA ladder. Samples (10 µl) were run on 1% agarose gel. We decided to use the washing system 1, in which loss of single-stranded DNA is minimal. (d) Size distribution of single-stranded DNA produced. A mutant from the random library was sequenced for transposon insertion site (*yhiL*) and used for the preparation of biotinylated single-stranded DNA with a biotinylated Tn10OE primer. With the biotinylated single-stranded DNA as template, PCR was performed with a kanamycin specific outward primer and primers designed for amplification of 300-800 bp DNA fragments of the *yhiL* gene, respectively. As a control, wild-type *E. coli* genomic DNA was used as template. Samples (10 µl) were run on 1% agarose gel. M: DNA ladder.

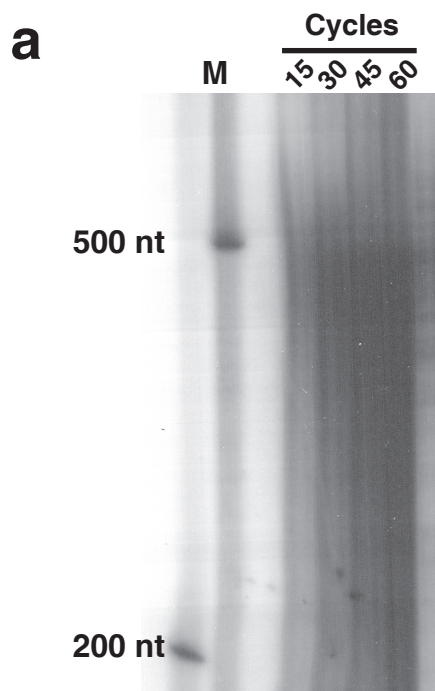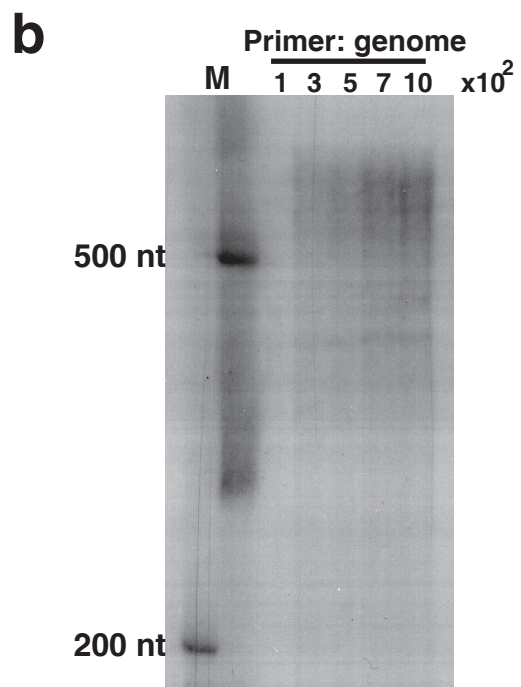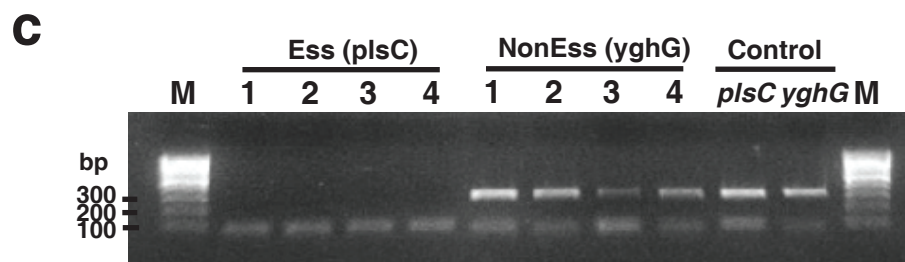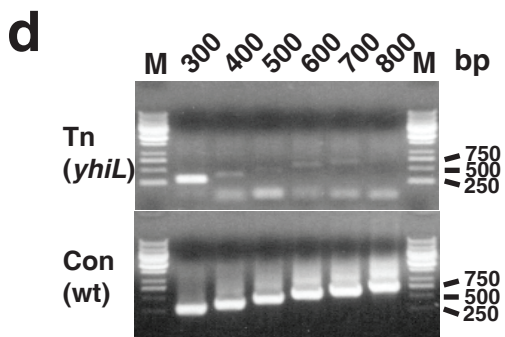

Supplement: gb-2007-8-5-r87-S6.pdf [file gb-2007-8-5-r87-S6.pdf]
