# Supplementary material for: Monitoring of gene knockouts: genome-wide profiling of conditionally essential genes
Source: PubMed Central journal article supplement (PMC1929150; doi:10.1186/gb-2007-8-5-r87), 2007-05-22
Supplement: gb-2007-8-5-r87-S5.pdf [file gb-2007-8-5-r87-S5.pdf]

## Supplementary Figure 2

Chromosomal location of genes identified in the aromatic amino acid selection with the defined (red) and random (black) library. The start position of each gene on the chromosome is as follows: *aroA* (959,234); *trpA* (1,318,936); *trpB* (1,320,129); *trpC* (1,321,499); *trpD* (1,323,098); *trpE* (1,324,660); *aroD* (1,776,400); *aroC* (2,452,919); *pheA* (2,736,401); *tyrA* (2,738,725); *aroB* (4,121,930); *aroE* (4,209,578); and *tyrB* (4,270,704). That most genes unidentified with the random library are located around the replication terminus region indicates that mutants corresponding to those genes are underrepresented in the random library.

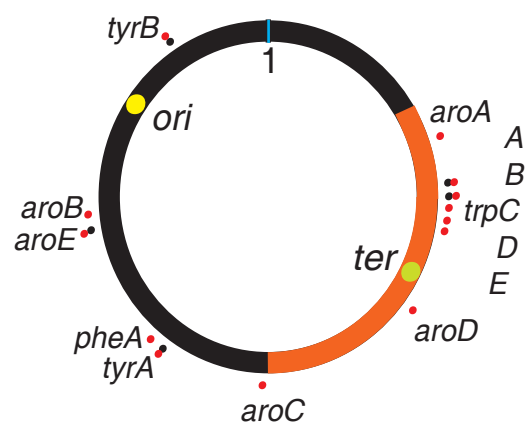

● genes identified with the defined library  
● genes identified with the random library
